# Supplementary figures and images for: PSA Depletion Induces the Differentiation of Immature Neurons in the Piriform Cortex of Adult Mice
Source: MDPI journal article supplement (doi:10.3390/ijms22115733), 2021-05-27

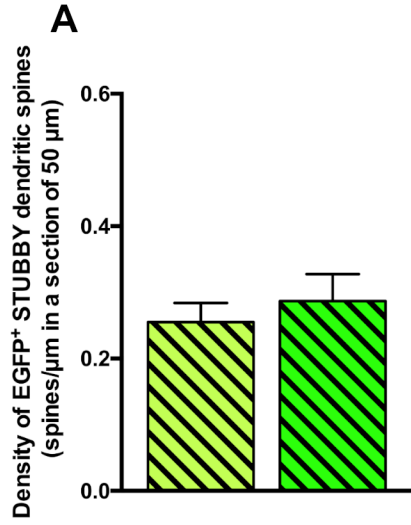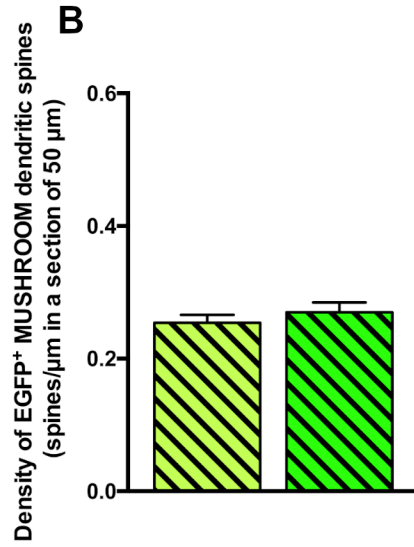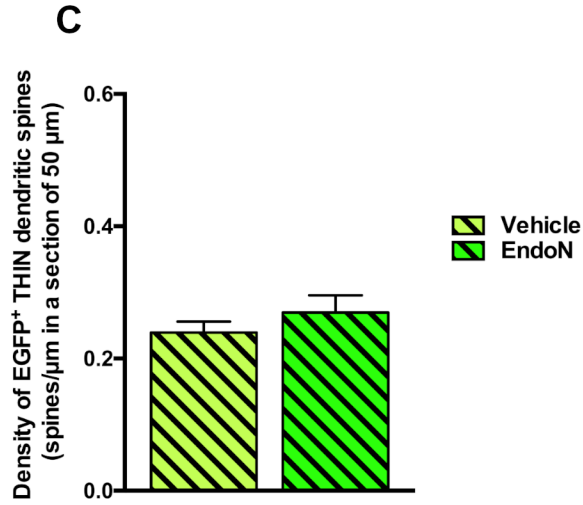

Supplement: s1 [file s1]

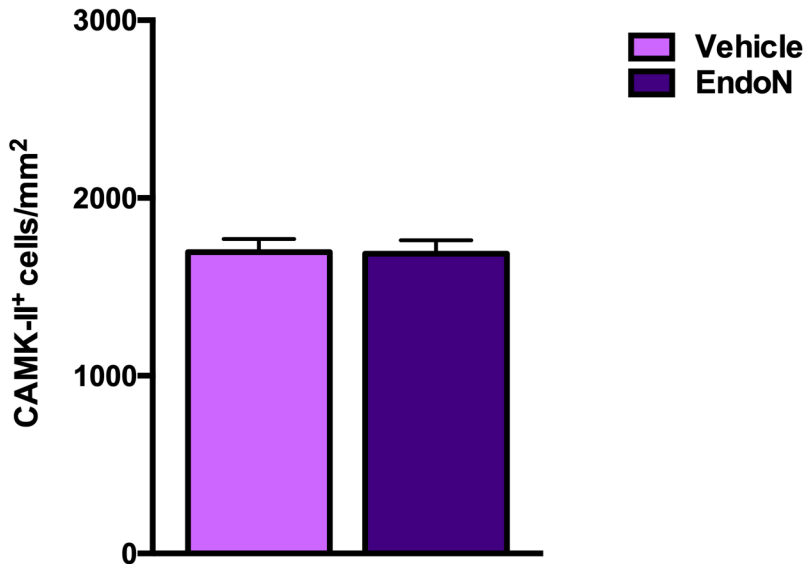

Supplement: s1 [file s1]

**A**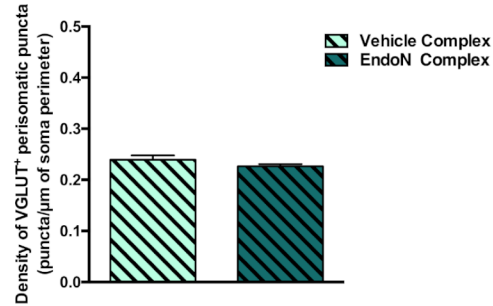**B**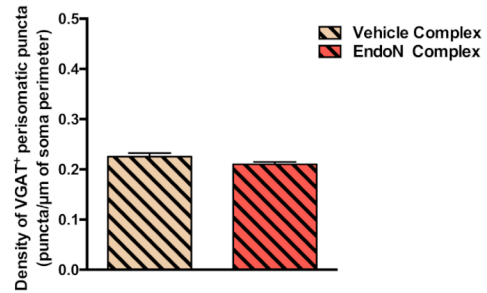**C**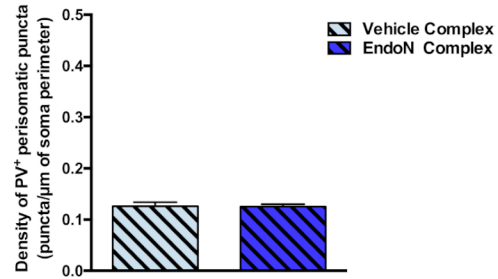**D**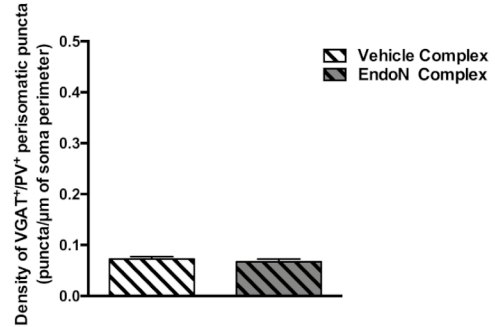

Supplement: s1 [file s1]
